# Supplementary material
Source: Springer Nature journal article supplement (https://www.springermedizin.de/resource/supplementary/12936_2012_2197_MOESM3_ESM.pdf/9542640)
Supplement: MOESM3 [file 9542640]

**Additional file 3.** Spearman's rank correlation coefficients between cytokine and chemokine concentrations in the study population. \*  $P < 0.05$ .

|                |             |               |             |              |             |              |             |              |         |
|----------------|-------------|---------------|-------------|--------------|-------------|--------------|-------------|--------------|---------|
| IFN- $\gamma$  | 0.4378<br>* |               |             |              |             |              |             |              |         |
| IL-2           | 0.4850<br>* | 0.4054<br>*   |             |              |             |              |             |              |         |
| IL-10          | -0.0708     | 0.2249        | -0.0733     |              |             |              |             |              |         |
| IL-8           | -0.0922     | 0.1167        | -0.0554     | 0.4372<br>*  |             |              |             |              |         |
| IL-6           | -0.1546     | 0.0528        | -0.1304     | 0.8682<br>*  | 0.5536<br>* |              |             |              |         |
| IL-4           | 0.6926<br>* | 0.5090<br>*   | 0.4174<br>* | -0.0657      | -0.0077     | -0.1290      |             |              |         |
| IL-1 $\beta$   | 0.4785<br>* | 0.5315<br>*   | 0.3390<br>* | 0.3422<br>*  | 0.3420<br>* | 0.3247<br>*  | 0.6527<br>* |              |         |
| TNF            | 0.3991<br>* | 0.3934<br>*   | 0.3021<br>* | 0.3756<br>*  | 0.3817<br>* | 0.3516<br>*  | 0.4192<br>* | 0.6710<br>*  |         |
| TGF- $\beta$ 1 | 0.0227      | -0.0962       | -0.1395     | -0.3890<br>* | -0.2117     | -0.3608<br>* | -0.0714     | -0.1834      | -0.2656 |
|                | IL-12p70    | IFN- $\gamma$ | IL-2        | IL-10        | IL-8        | IL-6         | IL-4        | IL-1 $\beta$ | TNF     |
